# Supplementary material for: Green synthesis of a bromocresol purple/graphene composite and its application in electrochemical determination of 2,4,6-trichlorophenol
Source: Royal Society of Chemistry journal article supplement (doi:10.1039/c5ay00177c), 2015-01-01
Supplement: c5ay00177c1.pdf [file c5ay00177c1.pdf]

## Supporting information

### **Green synthesis of bromocresol purple/graphene composite and its application in electrochemical determination of 2,4,6-trichlorophenol**

Xiaolin Zhu<sup>a</sup>, Jiguang Liu<sup>b</sup>, Zeshi Zhang<sup>a</sup>, Nan Lu<sup>a</sup>, Xing Yuan<sup>a,\*</sup>, Dongmei Wu<sup>c,\*</sup>

*<sup>a</sup> State Environmental Protection Key Laboratory of Wetland Ecology and Vegetation Restoration, School of Environment, Northeast Normal University, Changchun 130117, P.R. China*

*<sup>b</sup> School of Stomatology, Jiamusi University, Jiamusi 154007, P.R. China*

*<sup>c</sup> College of Pharmacy, Jiamusi University, Jiamusi 154007, P.R. China*

\* Corresponding author, Tel.: +86 431 89165600; Fax: +86 431 89165606  
E-mail: yuanx@nenu.edu.cn (X. Yuan)

\* Corresponding author, Tel.: +86 454 8618461; Fax: +86 454 8618460  
E-mail: dmwu@jmsu.edu.cn (D.M. Wu)

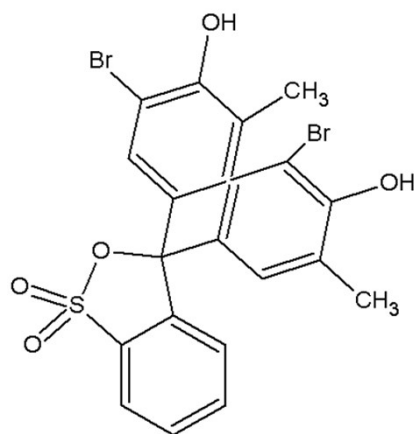

**Fig. S1** The structure of bromocresol purple (5,5'-Dibromo-o-cresolsulfonphthalein)

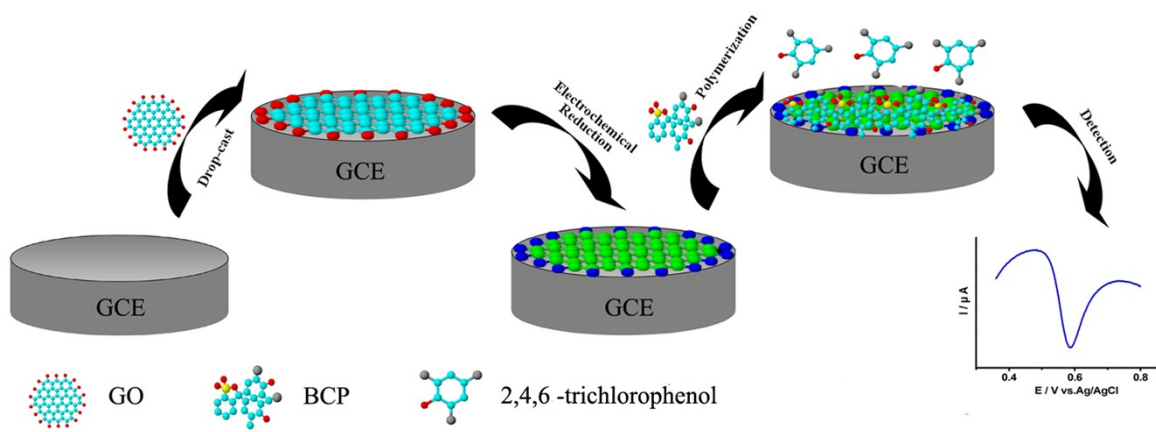

**Fig. S2** Schematic diagram of the fabrication procedure of BCP/erGO/GCE

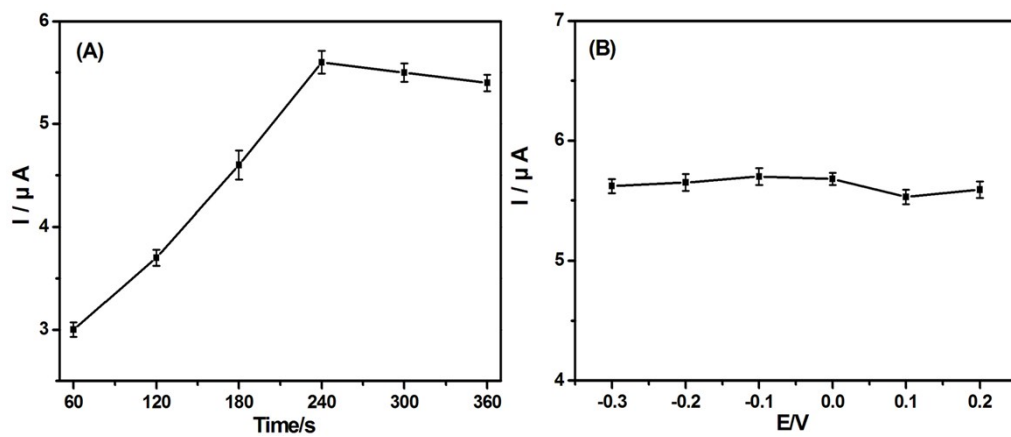

**Fig. S3** Influence of accumulation time (A) and accumulation potential (B) on the peak current of 50.0 μM

TCP in 0.1 M pH 7.0 PBS
